# Supplementary material for: PolySialic Acid Nanoparticles Actuate Complement-Factor-H-Mediated Inhibition of the Alternative Complement Pathway: A Safer Potential Therapy for Age-Related Macular Degeneration
Source: MDPI journal article supplement (doi:10.3390/ph17040517), 2024-04-17
Supplement: s1 [file s1]

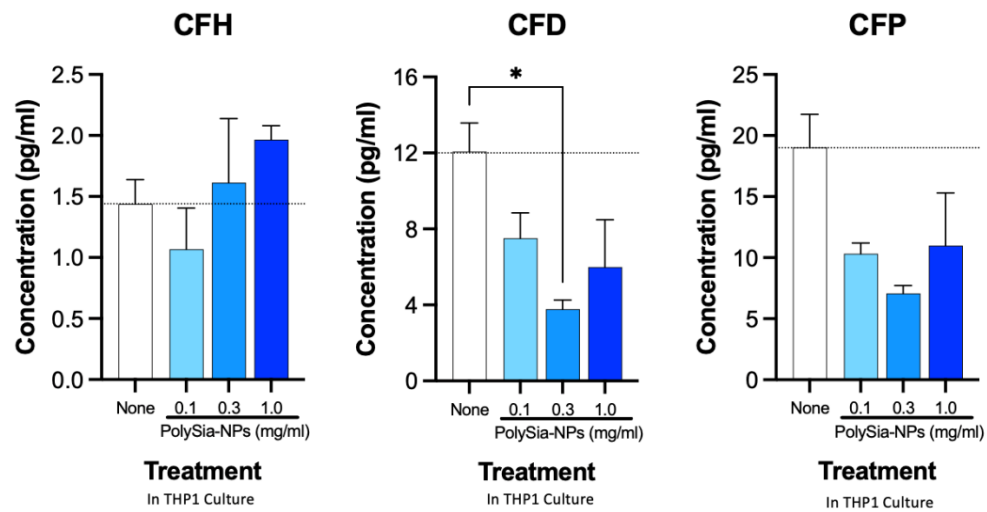

**Supplemental Figure S1:** Complement multiplex ELISA on THP-1 human macrophage cell line culture supernatant. \*  $p < 0.05$
